# Supplementary material
Source: Research Square preprint supplement (doi:10.21203/rs.3.rs-8916734/v1)
Supplement: Supplementary file 1 [file 53080c7422b460f53183a71d.docx]

# Supplementary Experimental Data for the Paper “Accuracy Improvement of MEMS Using Accelerometers for Gravity Measurements”

The main challenge in developing a Micro-electromechanical systems (MEMS) gyroscope compass is their relatively low sensitivity. In order to determine the direction of true north, the gyroscope must measure the Earth's rotation. The Earth's rotation rate is approximately 0.004 degrees per second, and MEMS gyroscopes are typically very noisy and insufficiently accurate at this resolution. The goal of this study is to develop techniques that can overcome the significant noise of MEMS gyroscopes when measuring the Earth's rotational rate within a relatively short time frame.

This document summarizes the statistical results obtained during the experimental evaluation of the MEMS accelerometer system used for gravity measurements. The tables and figures present the mean gravity estimation and the measurement variability across multiple power-on cycles. These results support the conclusions of the article regarding the improvement of measurement accuracy through calibration, averaging, bias compensation, and sinusoidal fitting.

Table 1 presents the measured normalized acceleration components Gx, Gy, and Gz recorded at different temperatures during the experiment. The results demonstrate a gradual variation of the accelerometer readings with temperature, highlighting the importance of temperature compensation and stabilization in high-precision gravity measurements.

## Table 1 – Mean Estimated Gravity Value for Each Power-On Measurement Run

| | Temperature (°C) | | --- | | | Gx |  |  | | --- | --- | --- | | Gy | Gz |
| --- | --- | --- | --- | --- | --- | --- | --- |
| 20.5030 | 0.432013672 | 0.426073731 | 0.78589502 |
| 20.7565 | 0.433985057 | 0.426451541 | 0.78620493 |
| 20.9452 | 0.434762172 | 0.426707234 | 0.78635458 |
| 21.0299 | 0.434862037 | 0.426591697 | 0.78609914 |
| 21.4551 | 0.435686245 | 0.427016085 | 0.78534849 |
| 21.6038 | 0.435819767 | 0.427080410 | 0.78616229 |
| 21.7295 | 0.435076137 | 0.427174216 | 0.78650780 |
| 21.8922 | 0.434404141 | 0.426946888 | 0.78629070 |
| 21.9860 | 0.433200250 | 0.426403297 | 0.78567450 |
| 22.0739 | 0.432113800 | 0.426170120 | 0.78616546 |
| 22.2246 | 0.431847243 | 0.426164030 | 0.78621346 |
| 22.3313 | 0.431793639 | 0.426016132 | 0.78601610 |
| 22.4571 | 0.431492728 | 0.425746651 | 0.78525688 |
| 22.5459 | 0.431296587 | 0.425484724 | 0.78590110 |
| 22.6520 | 0.431261501 | 0.425313923 | 0.78537383 |
| 22.7585 | 0.431470555 | 0.425716195 | 0.78582069 |

The results presented in Tables 2 and 3 summarize the statistical analysis of gravity measurements obtained from the MEMS accelerometer system across multiple power-on cycles. Table 2 presents the mean estimated gravitational value, including rotation averaging, bias compensation, and sinusoidal fitting. Table 3 presents the standard deviation of the measurements, which quantifies the variability of the estimated gravity values across the measurement cycles. The results show that applying additional processing techniques, such as bias removal and sinusoidal approximation, reduces measurement variability and improves overall stability.

Table 2 – Normalized mean estimated gravity value for each power-on measurement cycle

| Run | Avg Only | Avg + Sine | Avg + Bias | Avg + Sine + Bias |
| --- | --- | --- | --- | --- |
| 1 | 1.001838170 | 1.001836570 | 1.001820130 | 1.001819060 |
| 2 | 1.001630550 | 1.001629300 | 1.001611040 | 1.001610290 |
| 3 | 1.001890100 | 1.001888290 | 1.001868030 | 1.001867270 |
| 4 | 1.001752830 | 1.001751080 | 1.001730140 | 1.001729460 |
| 5 | 1.001689840 | 1.001687950 | 1.001666690 | 1.001665900 |
| 6 | 1.001705160 | 1.001703420 | 1.001681110 | 1.001680490 |
| 7 | 1.001549460 | 1.001547760 | 1.001525520 | 1.001524820 |
| 8 | 1.001673220 | 1.001671280 | 1.001650190 | 1.001649240 |
| 9 | 1.001582010 | 1.001580270 | 1.001560240 | 1.001559560 |
| 10 | 1.001472800 | 1.001471340 | 1.001454060 | 1.001453420 |
| 11 | 1.001119190 | 1.001118130 | 1.001101150 | 1.001100580 |
| 12 | 1.001453440 | 1.001452320 | 1.001434870 | 1.001434310 |
| 13 | 1.002118280 | 1.002116450 | 1.002097140 | 1.002096140 |

## Table 3 – Standard deviation of gravity measurements across power-on runs

| Run | STD Only | STD + Sine | STD + Bias | STD + Sine + Bias |
| --- | --- | --- | --- | --- |
| 1 | 0.00067716 | 0.00067725 | 0.00067583 | 0.00067716 |
| 2 | 0.00066139 | 0.00066115 | 0.00066032 | 0.00066139 |
| 3 | 0.00077011 | 0.00076991 | 0.00076919 | 0.00077011 |
| 4 | 0.00066973 | 0.00066969 | 0.00066957 | 0.00066973 |
| 5 | 0.00055606 | 0.00055575 | 0.00055493 | 0.00055606 |
| 6 | 0.00059953 | 0.00059904 | 0.00059840 | 0.00059953 |
| 7 | 0.00040010 | 0.00039963 | 0.00039863 | 0.00040010 |
| 8 | 0.00051242 | 0.00051234 | 0.00051149 | 0.00051242 |
| 9 | 0.00055484 | 0.00055470 | 0.00055390 | 0.00055484 |
| 10 | 0.00052992 | 0.00052977 | 0.00052985 | 0.00052992 |
| 11 | 0.00050754 | 0.00050729 | 0.00050667 | 0.00050754 |
| 12 | 0.00074166 | 0.00074137 | 0.00074035 | 0.00074166 |
| 13 | 0.00090287 | 0.00090249 | 0.00090103 | 0.00090287 |
